# Supplementary material for: The β-N-Acetylhexosaminidase in the Synthesis of Bioactive Glycans: Protein and Reaction Engineering
Source: Molecules. 2019 Feb 8;24(3):599. doi: 10.3390/molecules24030599 (PMC6384963; doi:10.3390/molecules24030599)
Supplement: Supplementary file 1 [file molecules-24-00599-s001.pdf]

## Supplementary Materials

# The $\beta$ -N-Acetylhexosaminidase in the Synthesis of Bioactive Glycans: Protein and Reaction Engineering

Pavla Bojarová<sup>1,\*</sup>, Natalia Kulik<sup>2</sup>, Michaela Hovorková<sup>1</sup>, Kristýna Slámová<sup>1</sup>, Helena Pelantová<sup>3</sup> and Vladimír Křen<sup>1</sup>

<sup>1</sup> Laboratory of Biotransformation, Institute of Microbiology, Czech Academy of Sciences, Vídeňská 1083, CZ-14220 Praha 4, Czech Republic; bojarova@biomed.cas.cz (P. B.); michaela.hovorkova@natur.cuni.cz (M. H.); slamova.kristyna@gmail.com (K. S.); kren@biomed.cas.cz (V. K.)

<sup>2</sup> Center for Nanobiology and Structural Biology, Institute of Microbiology, Czech Academy of Sciences, Zámek 136, CZ-37333 Nové Hradky, Czech Republic; kulik@nh.cas.cz (N. K.)

<sup>3</sup> Laboratory of Molecular Structure Characterization, Institute of Microbiology, Czech Academy of Sciences, Vídeňská 1083, CZ-14220 Praha 4, Czech Republic; pelantova@biomed.cas.cz (H. P.)

\* Correspondence: bojarova@biomed.cas.cz; Tel.: +420-296-442-360

Received: date; Accepted: date; Published: date

**Abstract:** *N*-Acetylhexosamine oligosaccharides terminated with GalNAc act as selective ligands of galectin-3, a biomedically important human lectin. Their synthesis can be accomplished by  $\beta$ -N-acetylhexosaminidases (EC 3.2.1.52). Advantageously, these enzymes tolerate the presence of functional groups in the substrate molecule, such as the thiourea linker useful for covalent conjugation of glycans to a multivalent carrier, affording glyconjugates.  $\beta$ -N-Acetylhexosaminidases exhibit activity towards both *N*-acetylglucosamine (GlcNAc) and *N*-acetylgalactosamine (GalNAc) moieties. A point mutation of active-site amino acid Tyr to other amino acid residues, especially Phe, His and Asn, has previously been shown to strongly suppress the hydrolytic activity of  $\beta$ -N-acetylhexosaminidases, creating enzymatic synthetic engines. In the present work, we demonstrate that Tyr470 is an important mutation hotspot for altering the ratio of GlcNAcase/GalNAcase activity, resulting in mutant enzymes with varying affinity to GlcNAc/GalNAc substrates. The enzyme selectivity may additionally be manipulated by altering the reaction medium upon changing pH or adding selected organic co-solvents. As a result, we are able to fine-tune the  $\beta$ -N-acetylhexosaminidase affinity and selectivity, resulting in a high-yield production of the functionalized GalNAc $\beta$ 4GlcNAc disaccharide, a selective ligand of galectin-3.

---

### Contents

1. Synthesis of acceptor **2** (Scheme S1)
2. <sup>1</sup>H, <sup>13</sup>C NMR analysis of acceptor **2**, products **3** and **4** (Tables S1, S2, S3; Figures S1, S2, S3)
3. MS analysis of compounds **2**, **3**, **4** (Figures S4, S5, S6)
4. SDS-PAGE of *Tf*Hex WT, Tyr470Phe, Tyr470His and Tyr470Asn *Tf*Hex (Figure S7)
5. Molecular modeling and molecular dynamics simulations (Figures S8-S11)

## 1. Synthesis of acceptor 2

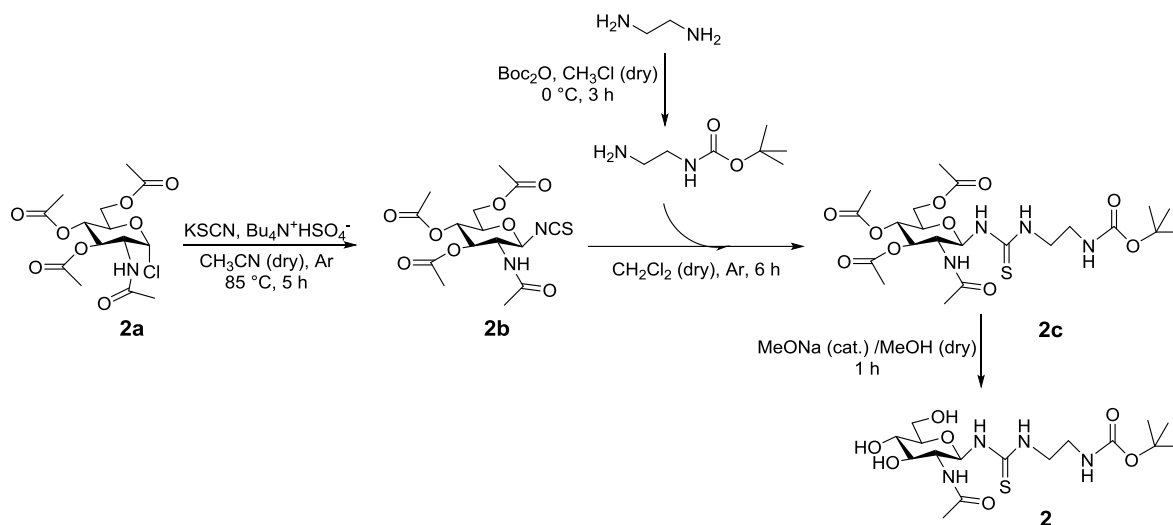

**Scheme S1.** Synthesis of acceptor 2 by adopted procedure based on Sauerzapfe et al. [1].

In the first step, 2-acetamido-3,4,6-tri-O-acetyl-2-deoxy-β-D-glucopyranosyl chloride **2a** (7 g, 19.1 mmol) [2], KSCN (3.73 g, 38.2 mmol), and tetrabutylammonium hydrogen sulfate (6.52 g, 19.1 mmol) were dissolved in dry acetonitrile (210 mL) with molecular sieve 4 Å (10 g) and left stirring under argon at 85 °C for 5 h. Then, it was left overnight at room temperature. The reaction mixture was filtered, evaporated *in vacuo* to dryness and purified by column chromatography (EtOAc/PE, 2/1) to afford 2-acetamido-3,4,6-tri-O-acetyl-2-deoxy-β-D-glucopyranosyl isothiocyanate **2b** (3 g, 7.7 mmol; 41%).

As the next step, ethylenediamine (6.11 g, 102 mmol) was dissolved in dry chloroform (50 mL) under argon and immersed to ice-cold bath. A solution of Boc-anhydride (2.28 g, 10.1 mmol) in dry chloroform (50 mL) was added dropwise. Reaction mixture was kept in an ice-cold bath for 3 h, then it was left to proceed at r.t. for 48 h. The reaction was quenched by the addition of distilled water (50 mL). Organic phase was washed with brine (3×40 mL), water phase was washed with chloroform (4×20 mL), organic phases were combined, dried over  $\text{Na}_2\text{SO}_4$  and evaporated to yield *tert*-butyl (2-aminoethyl)carbamate as brownish oil (1.51 g, 9.4 mmol; 93%). Prior to the conjugation step, this compound was thoroughly dried under vacuum.

In the last conjugation step, **2b** (1.55 g, 4.0 mmol) was combined with thoroughly dried *tert*-butyl (2-aminoethyl)carbamate under argon and dissolved in dry  $\text{CH}_2\text{Cl}_2$  (40 mL). The reaction proceeded for 6 h, then it was quenched by adding distilled water (40 mL). Organic phase was washed with water (3×10 mL) while water phase was washed with  $\text{CH}_2\text{Cl}_2$  (2×20 mL). Combined organics were washed with brine, dried over  $\text{Na}_2\text{SO}_4$ , then evaporated and purified by column chromatography (EtOAc/PE, 6/4) to obtain peracetylated product **2c** (2.17 g, 4.0 mmol; 99%). This compound was subsequently reacted under Zemplén conditions (catalytic amount of NaOMe, dry MeOH) to yield the desired deacetylated acceptor **2** (1.7 g, 99%).

## 2. NMR analysis of acceptor 2 and product 3

**Table S1.**  $^1\text{H}$  and  $^{13}\text{C}$  NMR data of acceptor 2 (399.87 MHz for  $^1\text{H}$ , 100.55 MHz for  $^{13}\text{C}$ ,  $\text{D}_2\text{O}$ , 30 °C).

|        | Atom              | $\delta_{\text{C}}$ | m. | $\delta_{\text{H}}$ | $n_{\text{H}}$ | m. | $J[\text{Hz}]$ |
|--------|-------------------|---------------------|----|---------------------|----------------|----|----------------|
| Boc    | CO                | 158.47              | S  | -                   | 0              |    |                |
|        | C                 | 81.37               | S  | -                   | 0              |    |                |
|        | $(\text{CH}_3)_3$ | 27.96               | Q  | 1.218               | 9              | s  |                |
| spacer | 1'                | 44.37               | T  | 3.39 <sup>a</sup>   | 2              | m  |                |
|        | 2'                | 39.44               | T  | 3.046               | 2              | m  |                |

|        |      |        |   |       |   |      |               |
|--------|------|--------|---|-------|---|------|---------------|
|        | CS   | n.d.   | S | -     | 0 |      |               |
| GlcNAc | 1    | 83.26  | D | 5.258 | 1 | br s |               |
|        | 2    | 54.81  | D | 3.665 | 1 | m    |               |
|        | 3    | 74.36  | D | 3.423 | 1 | dd   | 10.2, 8.6     |
|        | 4    | 69.94  | D | 3.265 | 1 | dd   | 9.9, 8.6      |
|        | 5    | 77.52  | D | 3.325 | 1 | ddd  | 9.9, 5.0, 2.1 |
|        | 6    | 60.88  | T | 3.683 | 1 | dd   | 12.4, 2.1     |
|        |      |        |   | 3.546 | 1 | dd   | 12.4, 5.0     |
|        | 2-CO | 175.27 | S | -     | 0 |      |               |
|        | Ac   | 22.31  | Q | 1.805 | 3 | s    |               |

n.d. ... not detected; <sup>a</sup> HSQC readout

**a**

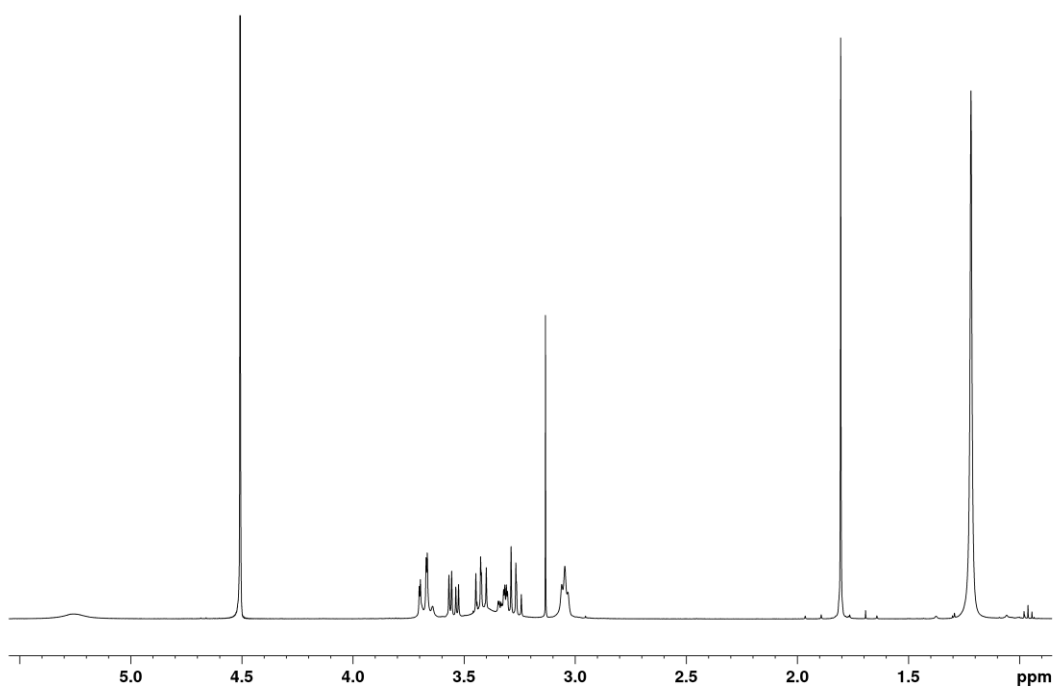

**b**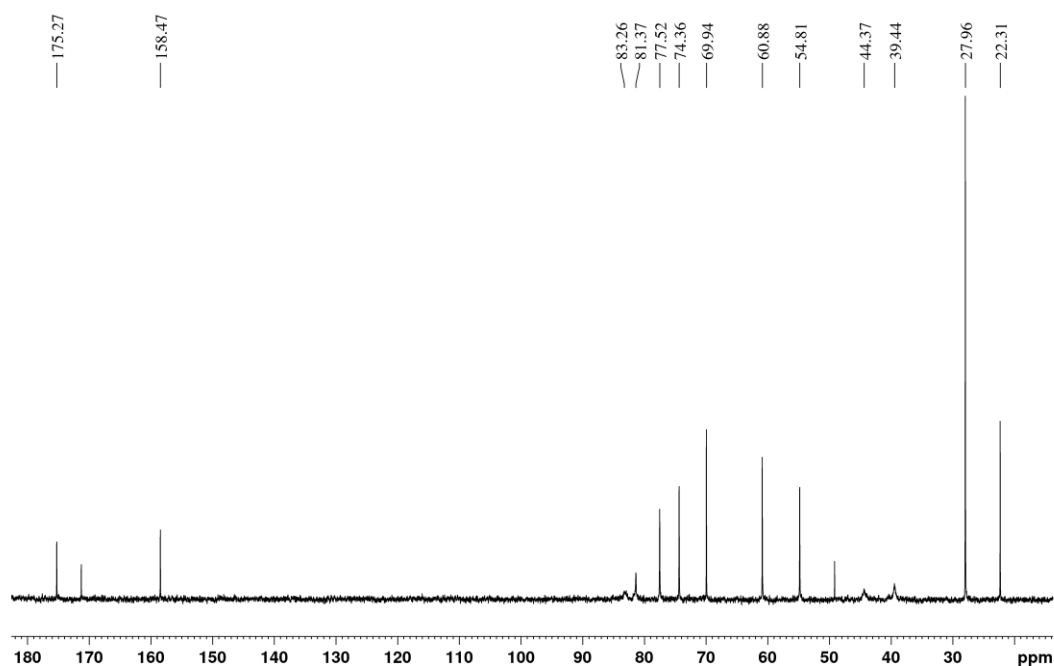

**Figure S1.** (a)  $^1\text{H}$  and (b)  $^{13}\text{C}$  NMR spectra of acceptor **2** (399.87 MHz for  $^1\text{H}$ , 100.55 MHz for  $^{13}\text{C}$ ,  $\text{D}_2\text{O}$ , 30 °C).

**Table S2.**  $^1\text{H}$  and  $^{13}\text{C}$  NMR data of disaccharide **3** (700.13 MHz for  $^1\text{H}$ , 176.05 MHz for  $^{13}\text{C}$ ,  $\text{D}_2\text{O}$ , 30 °C)

|        | Atom                            | $\delta_{\text{C}}$ | m. | $\delta_{\text{H}}$ | $n_{\text{H}}$ | m.   | $J$ [Hz]  |
|--------|---------------------------------|---------------------|----|---------------------|----------------|------|-----------|
| Boc    | CO                              | 158.49              | S  | -                   | 0              |      |           |
|        | C                               | 81.34               | S  | -                   | 0              |      |           |
|        | (CH <sub>3</sub> ) <sub>3</sub> | 27.96               | Q  | 1.217               | 9              | s    |           |
| spacer | 1'                              | 44.61               | T  | 3.45 <sup>a</sup>   | 2              | m    |           |
|        | 2'                              | 39.56               | T  | 3.050               | 2              | m    |           |
|        | CS                              | n.d.                | S  | -                   | 0              |      |           |
|        |                                 |                     |    |                     |                |      |           |
| GlcNAc | 1                               | 82.87               | D  | 5.365,              | 1              | br s |           |
|        |                                 |                     |    | 5.240               |                |      |           |
|        | 2                               | 54.08               | D  | 3.687               | 1              | m    |           |
|        | 3                               | 72.96               | D  | 3.60 <sup>a</sup>   | 1              | m    |           |
|        | 4                               | 78.92               | D  | 3.458               | 1              | m    |           |
|        | 5                               | 76.05               | D  | 3.395               | 1              | m    |           |
|        | 6                               | 60.24               | T  | 3.638               | 1              | m    |           |
|        |                                 |                     |    | 3.442               | 1              | m    |           |
|        | 2-CO                            | 175.31              | S  | -                   | 0              |      |           |
|        | Ac                              | 22.29               | Q  | 1.802               | 3              | s    |           |
| GalNAc | 1                               | 101.94              | D  | 4.328               | 1              | d    | 8.4       |
|        | 2                               | 52.84               | D  | 3.725               | 1              | dd   | 10.8, 8.4 |

|  |             |        |   |       |   |    |           |
|--|-------------|--------|---|-------|---|----|-----------|
|  | <b>3</b>    | 70.94  | D | 3.546 | 1 | dd | 10.8, 3.4 |
|  | <b>4</b>    | 67.90  | D | 3.735 | 1 | d  | 3.4       |
|  | <b>5</b>    | 75.60  | D | 3.518 | 1 | dd | 8.2, 4.0  |
|  | <b>6</b>    | 61.23  | T | 3.596 | 1 | dd | 11.7, 8.2 |
|  |             |        |   | 3.562 | 1 | dd | 11.7, 4.0 |
|  | <b>2-CO</b> | 175.02 | S |       | 0 |    |           |
|  | <b>Ac</b>   | 22.46  | Q | 1.855 | 3 | s  |           |

n.d. ... not detected; <sup>a</sup> HSQC readout

**a**

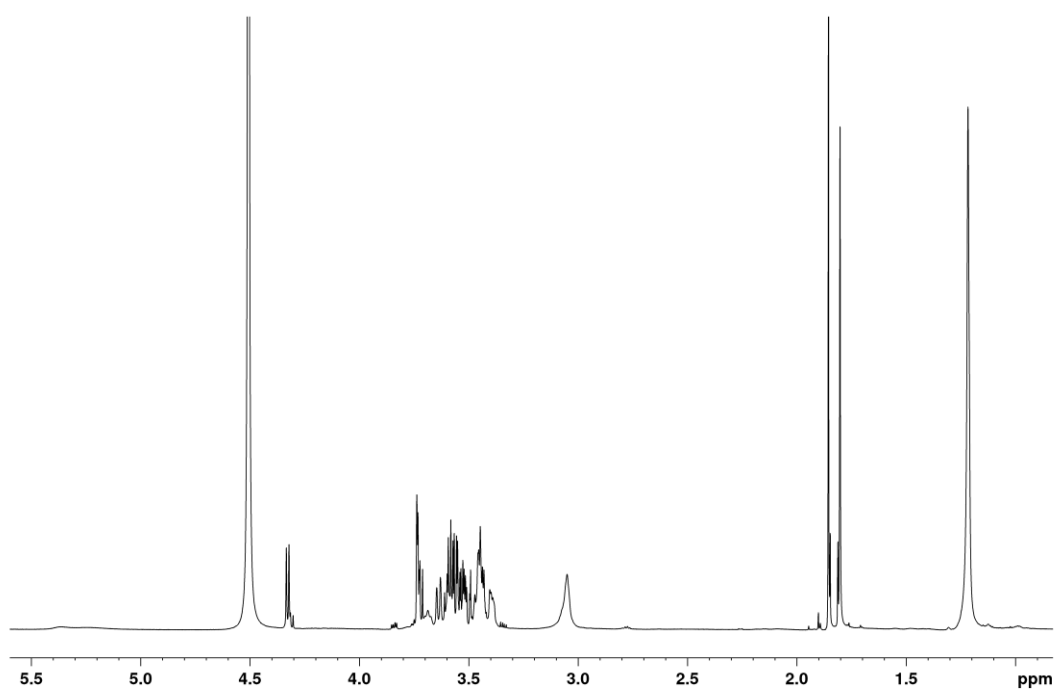

**b**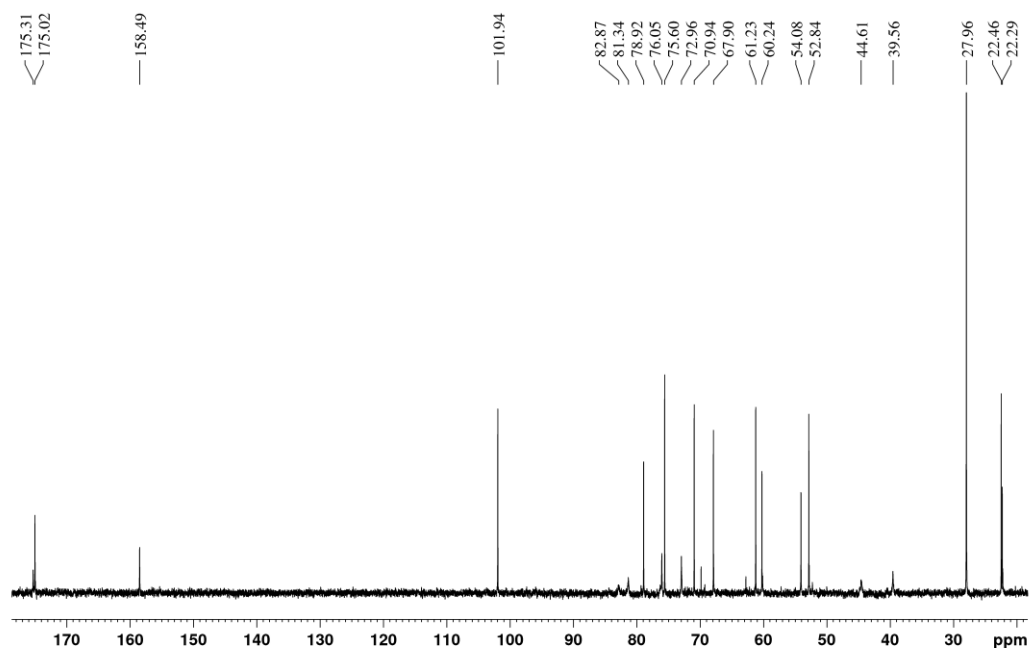

**Figure S2.** (a)  $^1\text{H}$  and (b)  $^{13}\text{C}$  NMR spectra of disaccharide **3** (700.13 MHz for  $^1\text{H}$ , 176.05 MHz for  $^{13}\text{C}$ ,  $\text{D}_2\text{O}$ , 30  $^\circ\text{C}$ ).

**Table S3.**  $^1\text{H}$  and  $^{13}\text{C}$  NMR data of disaccharide **4** (399.87 MHz for  $^1\text{H}$ , 100.55 MHz for  $^{13}\text{C}$ ,  $\text{D}_2\text{O}$ , 30  $^\circ\text{C}$ )

|        | Atom | $\delta_{\text{C}}$ | m. | $\delta_{\text{H}}$ | $n_{\text{H}}$ | m.   | $J$ [Hz] |
|--------|------|---------------------|----|---------------------|----------------|------|----------|
| spacer | 1'   | 42.91               | T  | 3.66 <sup>a</sup>   | 1              | m    |          |
|        |      |                     |    | 3.55 <sup>a</sup>   | 1              | m    |          |
|        | 2'   | 39.39               | T  | 2.91 <sup>a</sup>   | 2              | m    |          |
|        | CS   | n.d.                | S  | -                   | 0              |      |          |
| GlcNAc | 1    | 83.0 <sup>a</sup>   | D  | 5.313               | 1              | br s |          |
|        | 2    | 54.00               | D  | 3.71 <sup>a</sup>   | 1              | m    |          |
|        | 3    | 72.97               | D  | 3.60 <sup>a</sup>   | 1              | m    |          |
|        | 4    | 78.93               | D  | 3.46 <sup>a</sup>   | 1              | m    |          |
|        | 5    | 76.17               | D  | 3.41 <sup>a</sup>   | 1              | m    |          |
|        | 6    | 60.24               | T  | 3.63 <sup>a</sup>   | 1              | m    |          |
|        |      |                     |    | 3.44 <sup>a</sup>   | 1              | m    |          |
|        | 2-CO | 175.29              | S  | -                   | 0              |      |          |
|        | Ac   | 22.26               | Q  | 1.793               | 3              | s    |          |
| GalNAc | 1    | 101.94              | D  | 4.327               | 1              | d    | 8.4      |
|        | 2    | 52.84               | D  | 3.72 <sup>a</sup>   | 1              | m    |          |
|        | 3    | 70.91               | D  | 3.55 <sup>a</sup>   | 1              | m    |          |
|        | 4    | 67.89               | D  | 3.73 <sup>a</sup>   | 1              | m    |          |
|        | 5    | 75.61               | D  | 3.52 <sup>a</sup>   | 1              | m    |          |
|        | 6    | 61.24               | T  | 3.58 <sup>a</sup>   | 2              | m    |          |
|        | 2-CO | 175.04              | S  | -                   | 0              | m    |          |

|  |    |       |   |       |   |   |  |
|--|----|-------|---|-------|---|---|--|
|  | Ac | 22.46 | Q | 1.852 | 3 | s |  |
|--|----|-------|---|-------|---|---|--|

n.d. ... not detected; <sup>a</sup> HSQC readout

**a**

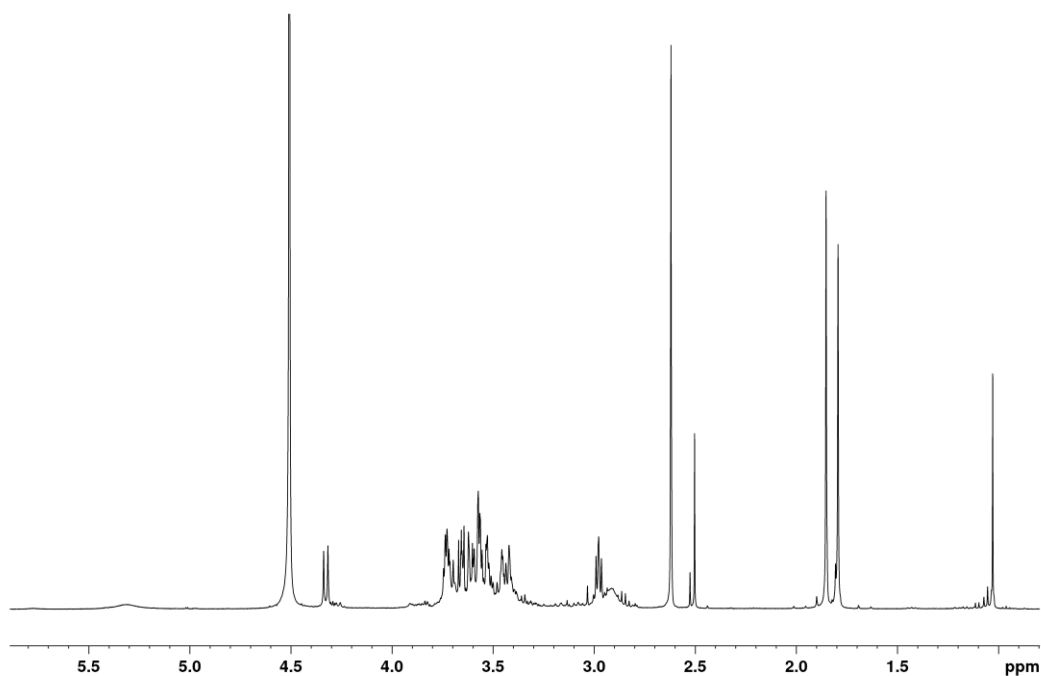

**b**

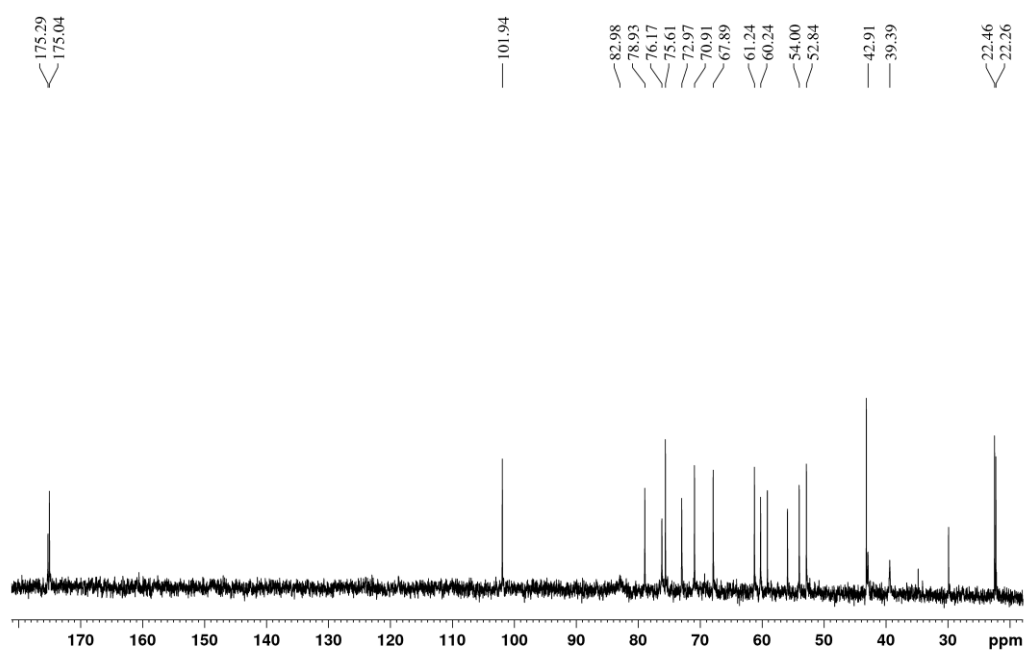

**Figure S3.** (a) <sup>1</sup>H and (b) <sup>13</sup>C NMR spectra of disaccharide **4** (399.87 MHz for <sup>1</sup>H, 100.55 MHz for <sup>13</sup>C, D<sub>2</sub>O, 30 °C).

### 3. MS analysis of acceptor 2, products 3 and 4

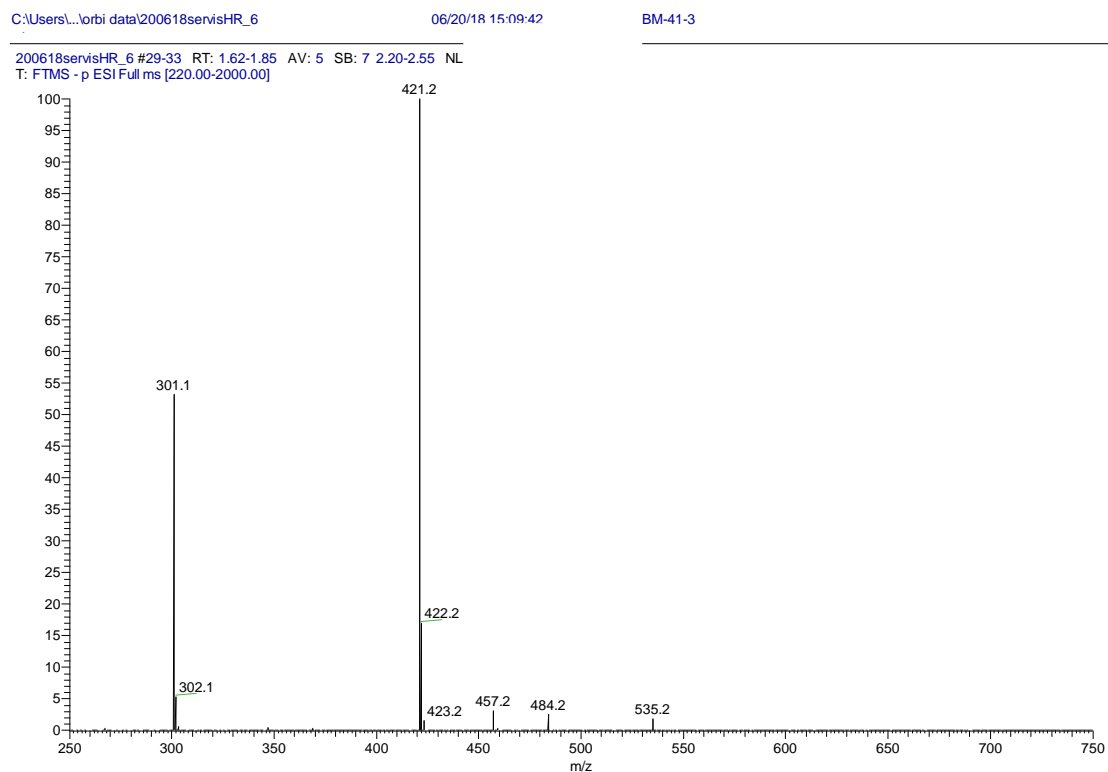

**Figure S4.** MS spectrum (ESI-) of product 3 ( $[M - H]^-$ ,  $m/z$  421.2;  $[M + Cl]^-$ ,  $m/z$  457.2;  $[M + NO_3]^-$ ,  $m/z$  484.2).

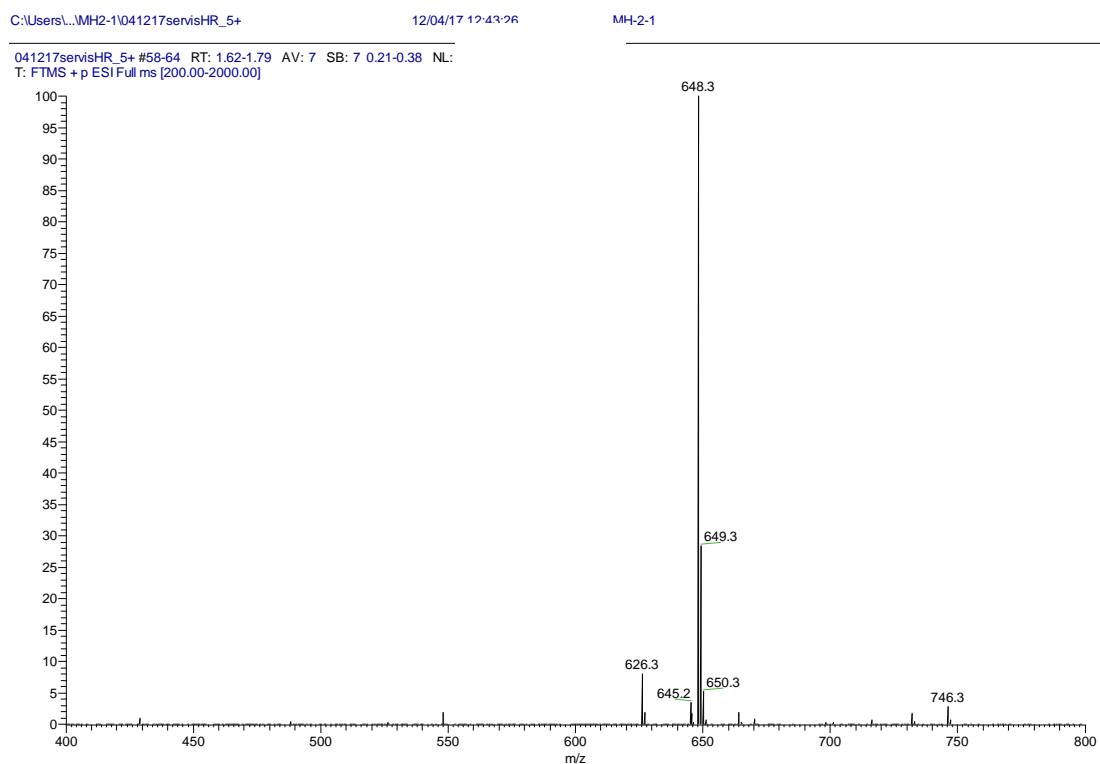

**Figure S5.** MS spectrum (ESI+) of product 3 ( $[M + Na]^+$ ,  $m/z$  648.3;  $[M + H]^+$ ,  $m/z$  626.3).

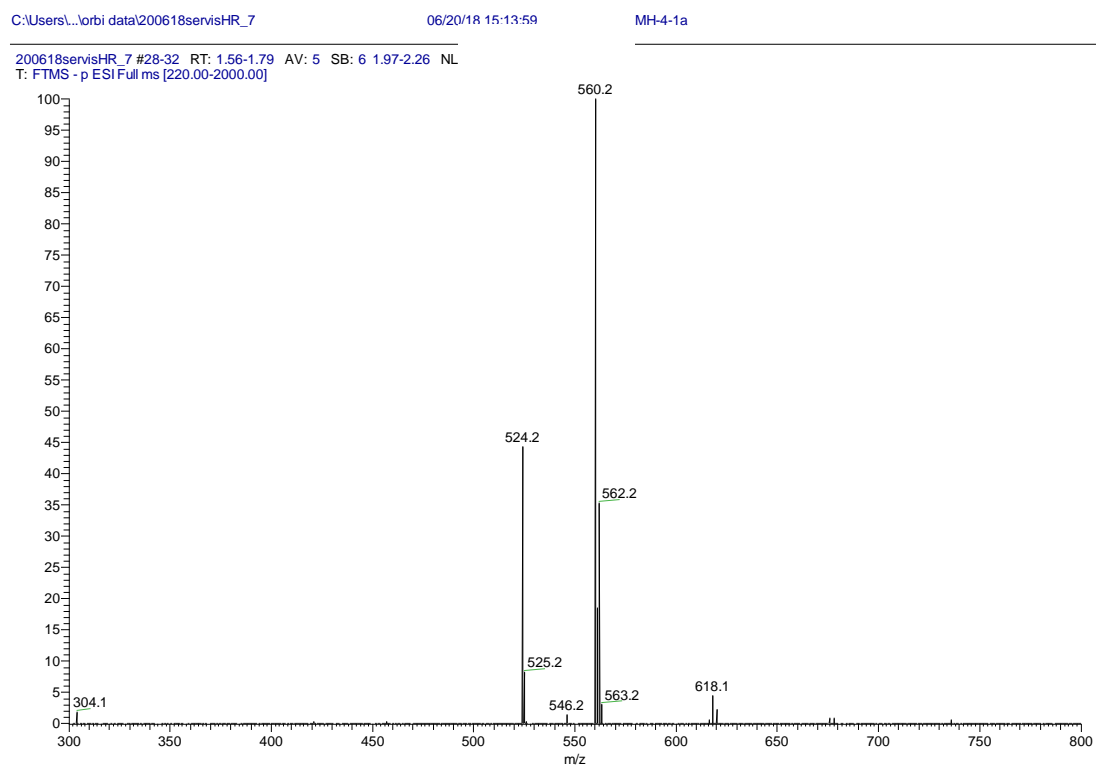

**Figure S6.** MS spectrum (ESI-) of compound **4** ( $[M - H]^-$ ,  $m/z$  524.2;  $[M - 2H + Na]^-$ ,  $m/z$  546.2;  $[M + Cl]^-$ ,  $m/z$  560.2). HRMS (ESI): calculated (for  $C_{19}H_{34}O_{10}N_5S$ ) 524.20319, measured 524.20245 (-1.40 ppm).

#### 4. SDS-PAGE of *TfHex* WT, Tyr470Phe, Tyr470His and Tyr470Asn *TfHex*

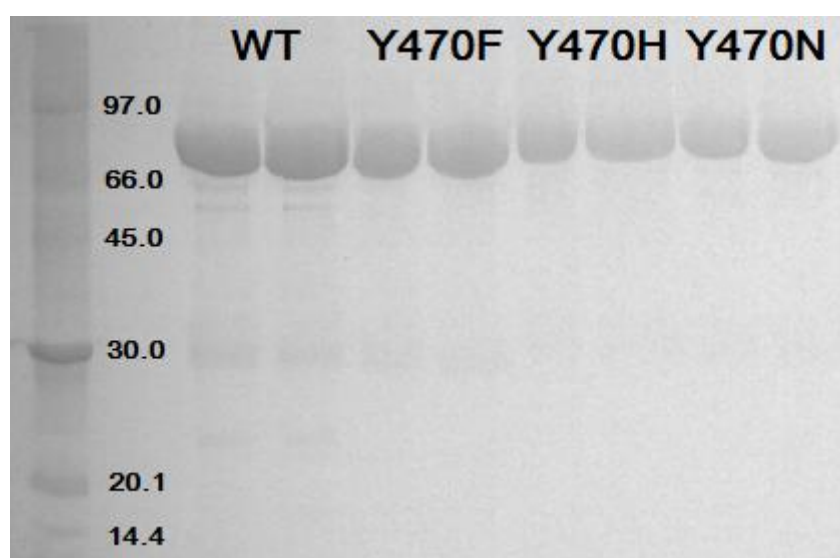

**Figure S7.** SDS-PAGE of mutant variants of *TfHex* WT, Tyr470Phe, Tyr470His and Tyr470Asn *TfHex*.

## 5. Molecular modeling and molecular dynamics simulations

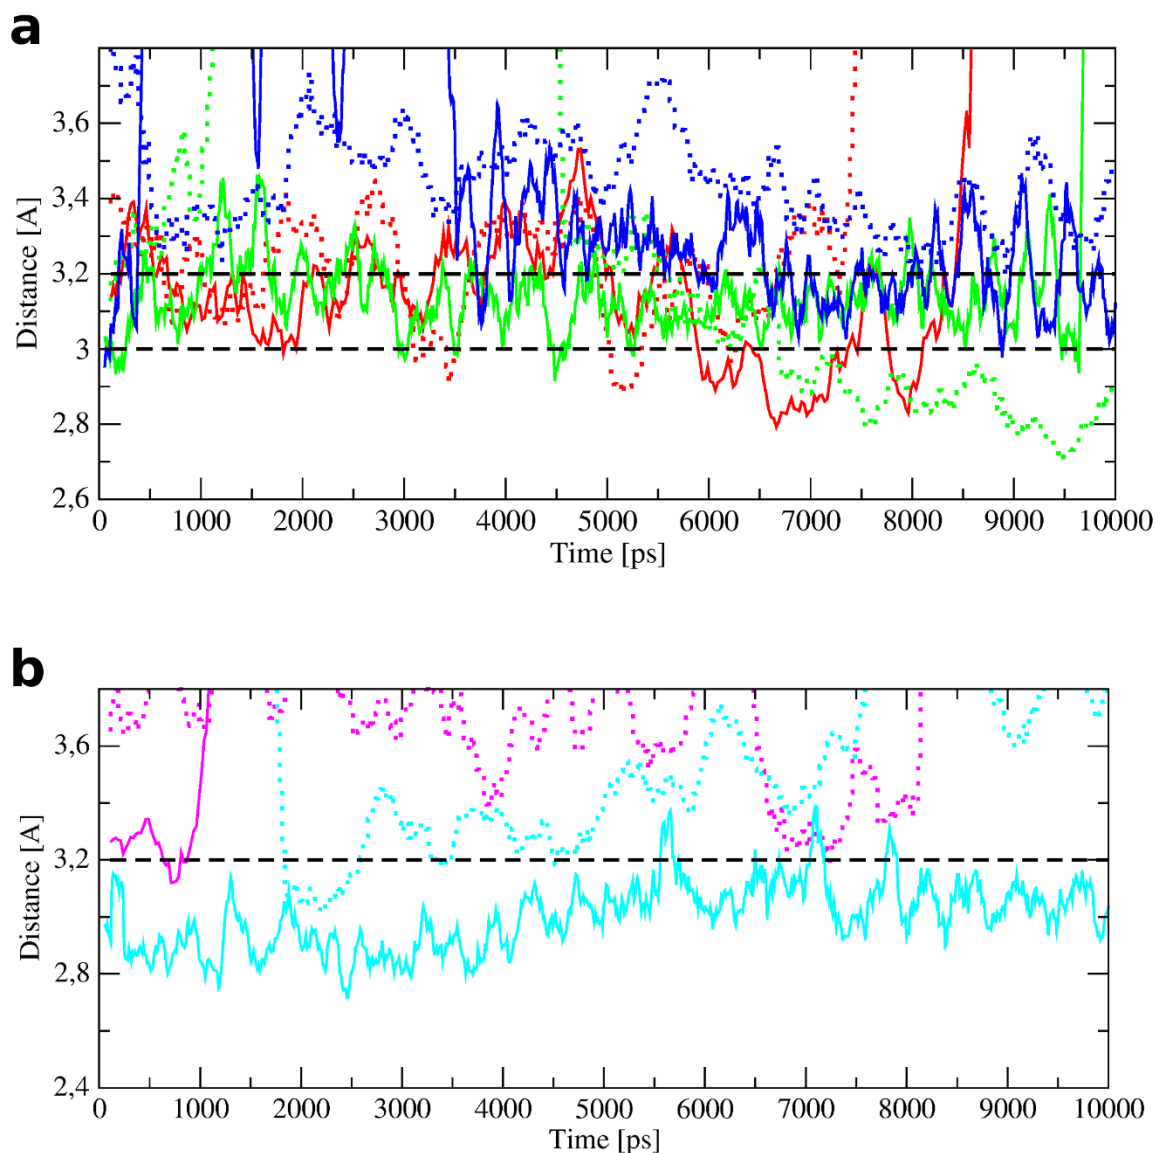

**Figure S8.** Distance between the carboxylic oxygen of catalytic Glu371 and the glycosidic oxygen of *p*NP-GlcNAc and *p*NP-GalNAc substrates in the active site of *Tj*Hex variants during molecular dynamic simulation. (a), The simulation of substrates docked into the WT (red), Tyr470Phe (green), and Tyr470His (blue) variants; (b), the simulation of substrates docked into the Tyr470His (neutral) variant in magenta, Tyr470His (positive) variant in turquoise. The simulation with *p*NP-GlcNAc is depicted in a full line, with *p*NP-GalNAc in a dotted line. The distance within 2.5–3.2 Å corresponds to weak hydrogen bond interaction and above 3.2 Å to a weak electrostatic [3]. The graphs are prepared with XMGRACE and data are averaged over 10 steps [4].

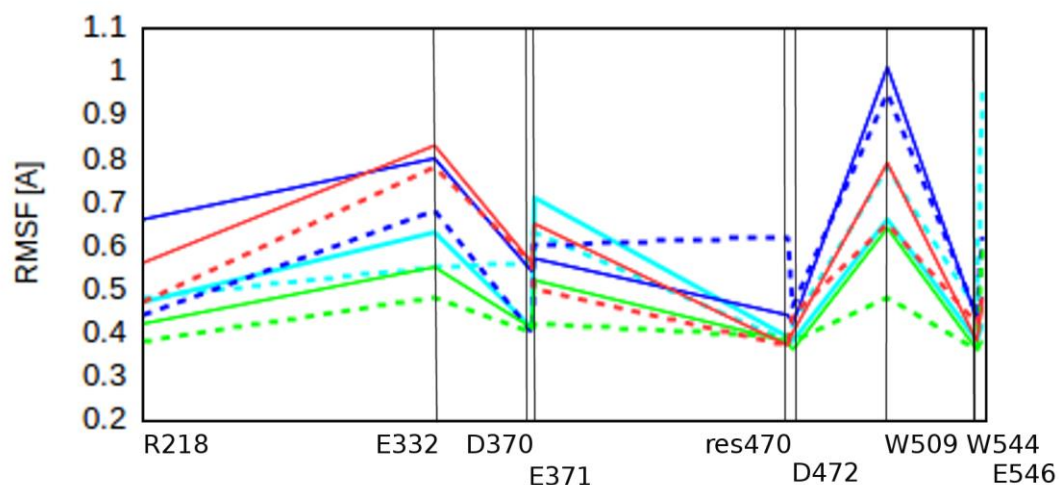

**Figure S9.** RMSF of active site residues in *TfHex* variants during a stable period of molecular dynamics run (2-10 ns). WT is shown in **red**, Tyr470Phe in **green**, Tyr470His (positive) in **blue**, Tyr470Asn in **turquoise**. The simulation with *pNP*-GlcNAc is depicted in a full line, with *pNP*-GalNAc in a dotted line. Res470 is Tyr, Phe, His or Asn, depending on the particular variant.

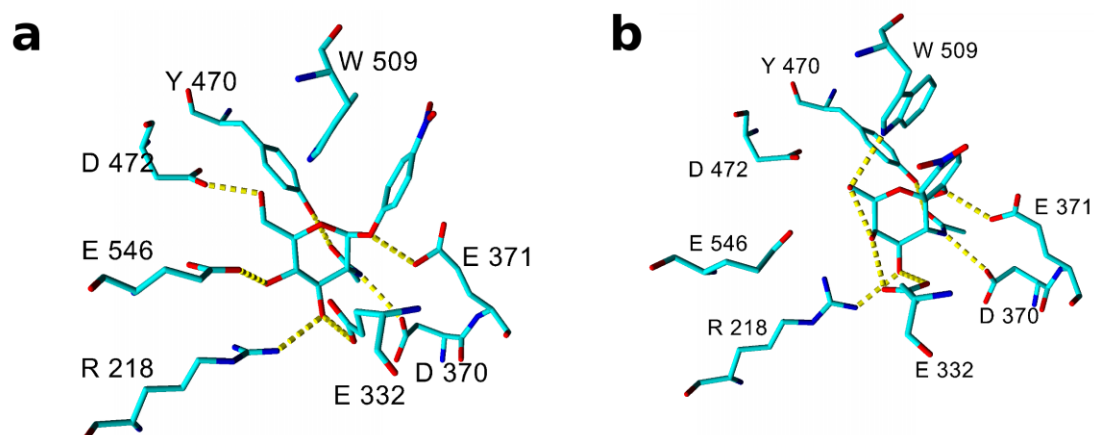

**Figure S10.** Complex of *pNP*-GlcNAc (a) and *pNP*-GalNAc (b) in the active site of *TfHex* WT after a stable period of molecular dynamics simulation.

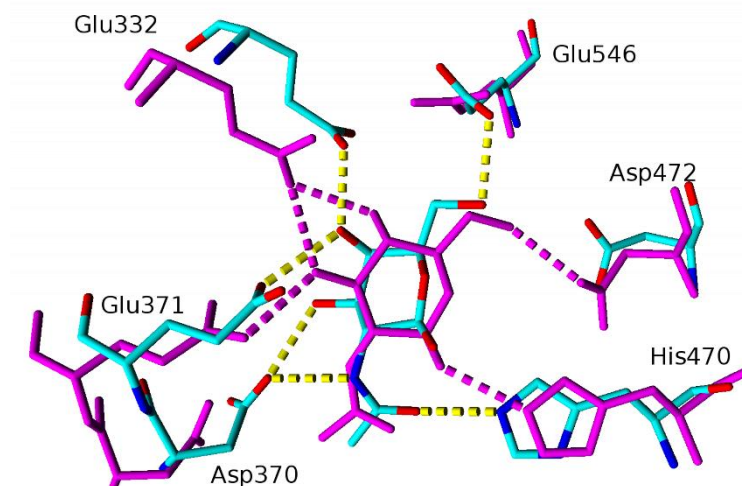

**Figure S11.** Overlay of complexes of hydrolytic products with the Tyr470His (positive) mutant variant after 10 ns of molecular dynamics simulation. GalNAc-Tyr470His complex is in **element colors**, GlcNAc-Tyr470His complex is in **magenta**. Hydrogen bonds are shown by dashed line. The position of both hydrolytic product is completely different from the respective *p*NP-substrates. As a result, the residue Arg218 does not interact with either product and the distance between the carbohydrate oxygen at C-1 and the oxygen of catalytic Glu371 is too far for a nucleophilic attack (4.7 and 5.6 Å for GalNAc and GlcNAc, respectively).

## References

1. Sauerzapfe, B.; Křenek, K.; Schmiedel, J.; Wakarchuk, W.W.; Pelantová, H.; Křen, V.; Elling, L. Chemo-enzymatic synthesis of poly-*N*-acetylglucosamine (poly-LacNAc) structures and their characterization for CGL2-galectin-mediated binding of ECM glycoproteins to biomaterial surfaces. *Glycoconj. J.* **2009**, *26*, 141–159, doi:10.1007/s10719-008-9172-2.
2. Fialová, P.; Weignerová, L.; Rauvolfová, J.; Přikrylová, V.; Pišvejcová, A.; Ettrich, R.; Kuzma, M.; Sedmera, P.; Křen, V. Hydrolytic and transglycosylation reactions of *N*-acyl modified substrates catalysed by  $\beta$ -*N*-acetylhexosaminidases. *Tetrahedron* **2004**, *60*, 693–701, doi: <https://doi.org/10.1016/j.tet.2003.10.111>.
3. Jeffrey, G. A. *An introduction to hydrogen bonding*; Oxford University Press: Oxford, UK, 1997; ISBN 0-19-509549-9.
4. Turner, P.J. *XMGRACE, Version 5.1.19*; Center for Coastal and Land-Margin Research, Oregon Graduate Institute of Science and Technology: Beaverton, OR, USA, 2005.
